# Supplementary material
Source: PubMed Central journal article supplement (PMC2447154)

## Supplementary Figure Legends

**Supplementary Figure 1. (A).** MDM2 binds to the coiled-coil domain of NS in cells. H1299 cells were transfected with Flag-tagged full length NS (wt) or a mutant containing N-terminal amino acids 1-175 (Flag-NS<sup>1-175</sup>) together with HA-MDM2 plasmid. Cell lysates were used for immunoprecipitation with the anti-Flag antibody followed by IB using antibodies as indicated. Cell lysates were also directly loaded onto a SDS gel for IB using the anti-HA antibody (bottom panel). **(B).** NS does not reduce ARF binding to MDM2. H1299 cells were transfected with different combinations of plasmids encoding HA-MDM2, Flag-NS and V5-ARF. Cell lysates were immunoprecipitated with the anti-Flag or anti-V5 antibody followed by IB using antibodies as indicated. Cell lysates were also directly loaded onto a SDS gel for IB using antibodies as indicated (bottom panels).

**Supplementary Figure 2. (A).** Overexpression of Flag-NS induces and activates p53. U2OS cells were transfected with increasing amounts of Flag-NS. Cell lysates were assayed by IB for the expression of p53, MDM2, p21, and Flag-NS. **(B).** Gating of GFP expressing cells. U2OS cells were transfected with GFP, GFP-NS, GFP-NS<sup>G1dm</sup>, or GFP-NS<sup>ct</sup> plasmid. GFP-expressing cells were then sorted by FACS into GFP<sup>+</sup> and GFP<sup>++</sup> populations as gated by M1 for GFP(+) and M2 for GFP(++) cells. **(C).** Overexpression of NS induces G1 arrest. U2OS cells were transfected with GFP, GFP-NS, GFP-NS<sup>G1dm</sup>, or GFP-NS<sup>ct</sup>. GFP-expressing cells were gated for cell cycle analysis. The representative histograms of PI staining from the experiments are shown.

# Supplementary Figure 1

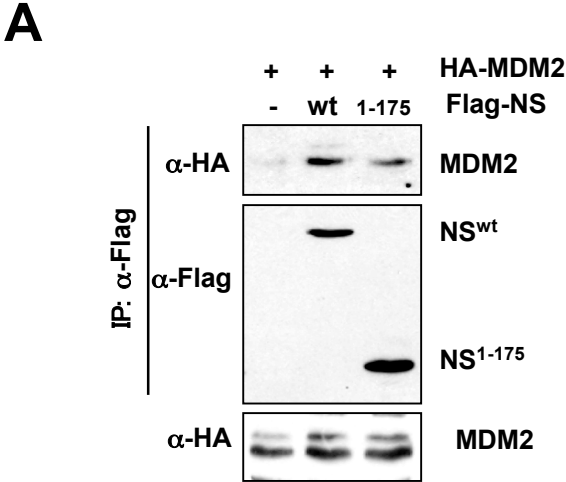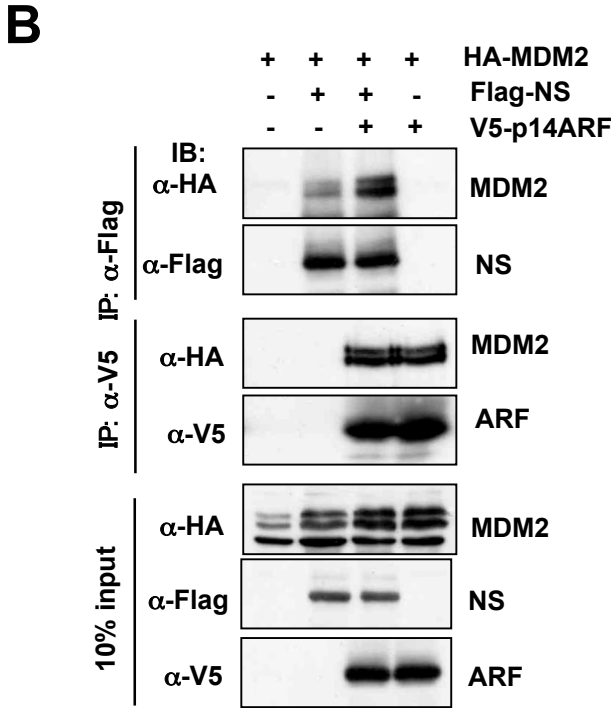

# Supplementary Figure S2

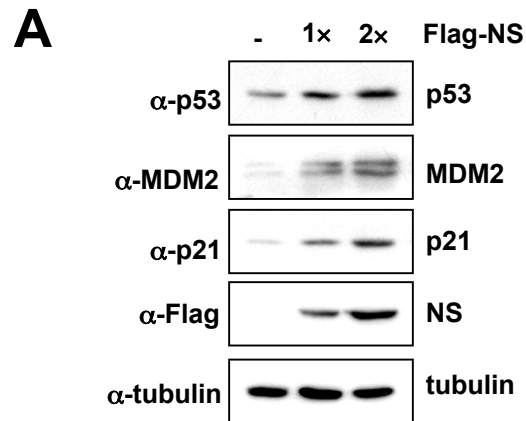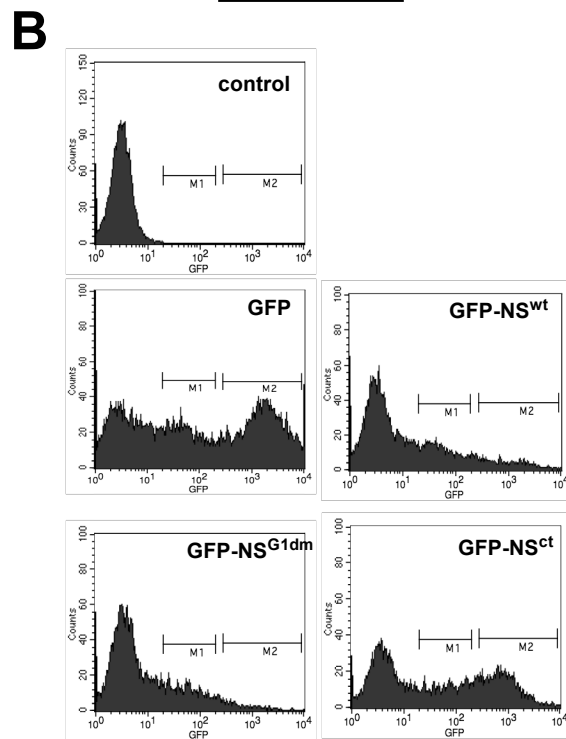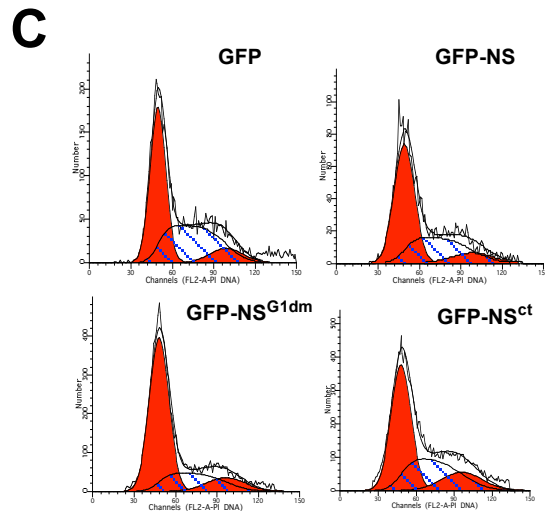

Supplement: supp_28_13_4365__1.pdf [file supp_28_13_4365__1.pdf]
